# Supplementary material for: Automated multiconformer model building for X-ray crystallography and cryo-EM
Source: eLife. 2024 Jun 21;12:RP90606. doi: 10.7554/eLife.90606 (PMC11192534; doi:10.7554/eLife.90606)
Supplement: Supplementary file 2. [file elife-90606-supp2.xlsx]

## Sheet: Sheet1
PDB	Depositor Resolution	Calculated Resolution (FSC 0.143)	In final dataset	Model_map FSC (deposited)	Model_map FSC (qFit)
6Z9E	1.55	1.72	Y	1.62	1.61
6Z9F	1.56	1.76	Y	1.63	1.62
7A4M	1.22	1.3	Y	1.34	1.35
7EFC	1.7	1.99	Y	1.83	1.82
7EFD	1.77	1.96	Y	1.82	1.86
7KFR	1.56	1.66	Y	1.64	1.64
7R5O	1.58	1.88	Y	1.89	1.88
7O6Q	1.88	1.89	Y	1.88	1.9
6CVM	1.9	No data provided
6YBQ	1.96	No data provided
6ZGL	1.9	No data provided
7A6B	1.33	No data provided
7DY0	1.93	2.33
7JJP	1.94	2.4
7JKC	1.9	No data provided
7MBX	1.95	2.33
7MIJ	1.98	No data provided
7P6A	1.9	2.28
7QEQ	1.9	2.13
7QKY	1.86	2.04
7Z15	1.93	2.71
7Z18	1.98	2.86
